# Supplementary material
Source: Springer Nature journal article supplement (https://www.springermedizin.de/resource/supplementary/13075_2013_4426_MOESM2_ESM.pdf/10110382)
Supplement: MOESM2 [file 10110382]

**a**

Propidium iodide

Normal fibroblasts

Diseased fibroblasts

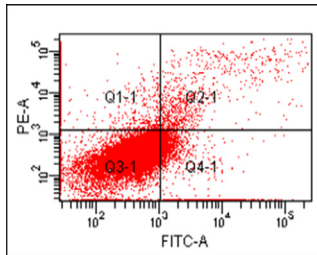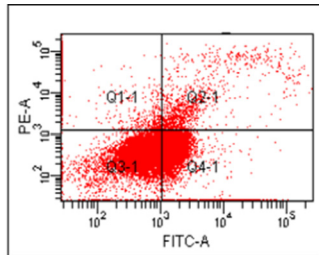

YOPRO-1

**b**

Ratio (%)

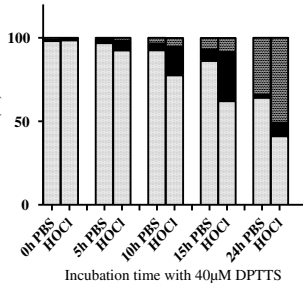

living cells

apoptotic cells

necrotic cells

Incubation time with 40 $\mu$ M DPTTS
